# Supplementary material
Source: Research Square preprint supplement (doi:10.21203/rs.3.rs-8983129/v1)
Supplement: Supplementary file 1 [file 3780f2d9ffd08aa58d788bdf.docx]

**Supplementary material for the paper:**

**5D Built Environment, Subjective Environmental Perception and Adolescent Obesity Risk in the Environment-Psychology-Behavior Framework: A Study Based on Machine Learning and Network Analysis**

**1.Pearson correlation coefficient**


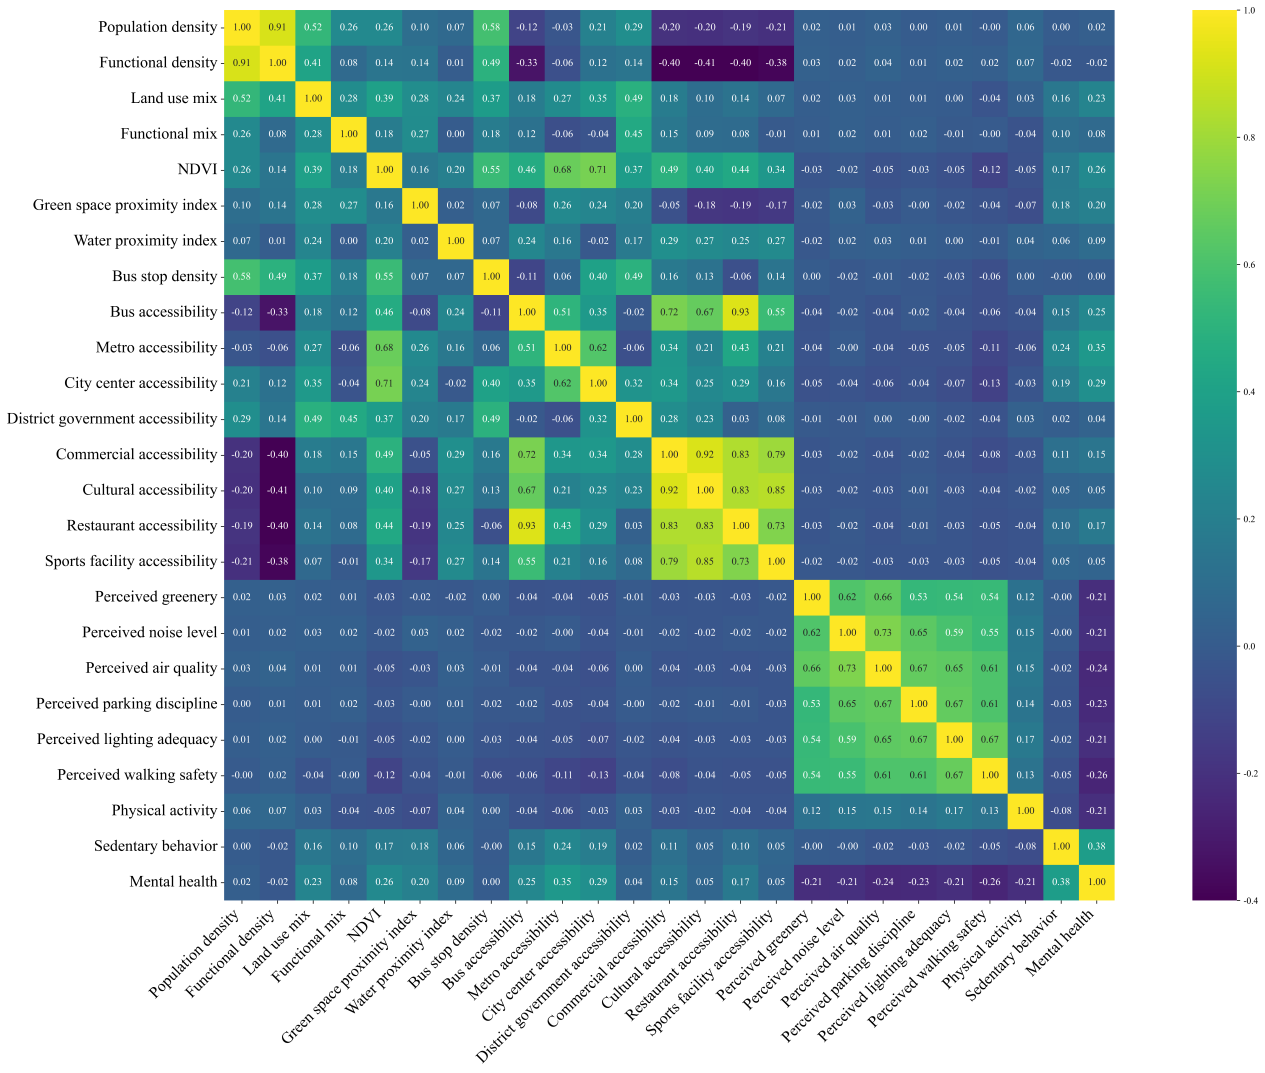


**Figure S1** Pearson correlation coefficient between measured variables

**2.The Guidelines for Screening Overweight and Obesity**

**Table S1** the Guidelines for Screening Overweight and Obesity in School-Aged Adolescents issued by the National Health Commission of China

| Age | Male | | Female | |
| --- | --- | --- | --- | --- |
| Overweight (Kg/m2) | Obesity (Kg/m2) | Overweight (Kg/m2) | Obesity (Kg/m2) |
| 10.0~ | 19.2 | 21.9 | 19.5 | 21.5 |
| 10.5~ | 19.6 | 22.5 | 20.0 | 22.1 |
| 11.0~ | 19.9 | 23.0 | 20.5 | 22.7 |
| 11.5~ | 20.3 | 23.6 | 21.1 | 23.3 |
| 12.0~ | 20.7 | 24.1 | 21.5 | 23.9 |
| 12.5~ | 21.0 | 24.7 | 21.9 | 24.5 |
| 13.0~ | 21.4 | 25.2 | 22.2 | 25.0 |
| 13.5~ | 21.9 | 25.7 | 22.6 | 25.6 |
| 14.0~ | 22.3 | 26.1 | 22.8 | 25.9 |
| 14.5~ | 22.6 | 26.4 | 23.0 | 26.3 |
| 15.0~ | 22.9 | 26.6 | 23.2 | 26.6 |
| 15.5~ | 23.1 | 26.9 | 23.4 | 26.9 |
| 16.0~ | 23.3 | 27.1 | 23.6 | 27.1 |
| 16.5~ | 23.5 | 27.4 | 23.7 | 27.4 |
| 17.0~ | 23.7 | 27.6 | 23.8 | 27.6 |
| 17.5~ | 23.8 | 27.8 | 23.9 | 27.8 |
| 18.0~ | 24.0 | 28.0 | 24.0 | 28.0 |

Note：The survey involved senior high school students, a small number of whom had already turned 18. Consequently, the study included a small group of 19-year-olds.Given that these students are still enrolled in high school, their learning environment and daily routines align with those of 18-year-old high school students. Therefore, the study calculates their BMI based on the 18-year-old category.

**3. Model validation**

Parameters tuning for the Gradient Boosting Decision Tree (GBDT) model was conducted by setting the number of estimators to {400}, the maximum tree depth to {2}, the minimum number of samples required to be at a leaf node to {30}, the subsample ratio to {0.7}, and the learning rate to {0.005}. A fixed random seed (random_state = 42) was used to ensure reproducibility.

**Table S2** Parameters tuning for GBDT

| Model | GBDT |
| --- | --- |
| n_estimators | 400 |
| learning_rate | 0.005 |
| max_depth | 2 |
| min_samples_leaf | 30 |
| random_state | 42 |
| subsample | 0.7 |

**Table S3** Predictive Performance of Seven Machine Learning Models

| Model | | Accuracy | Precision | Recall | F1-score |
| --- | --- | --- | --- | --- | --- |
| Model 1 | XGBoost | 0.5660 | 0.2727 | 0.6383 | 0.3822 |
| Model 2 | Random Forest | 0.5570 | 0.2636 | 0.6170 | 0.3694 |
| Model 3 | LightGBM | 0.5906 | 0.2741 | 0.5745 | 0.3711 |
| Model 4 | CatBoost | 0.5749 | 0.2670 | 0.5851 | 0.3667 |
| Model 6 | GBDT | 0.5861 | 0.2844 | 0.6383 | 0.3934 |
| Model 7 | HistGBDT | 0.5638 | 0.2673 | 0.6170 | 0.3730 |

**4.Network Analysis Robustness Test Results**


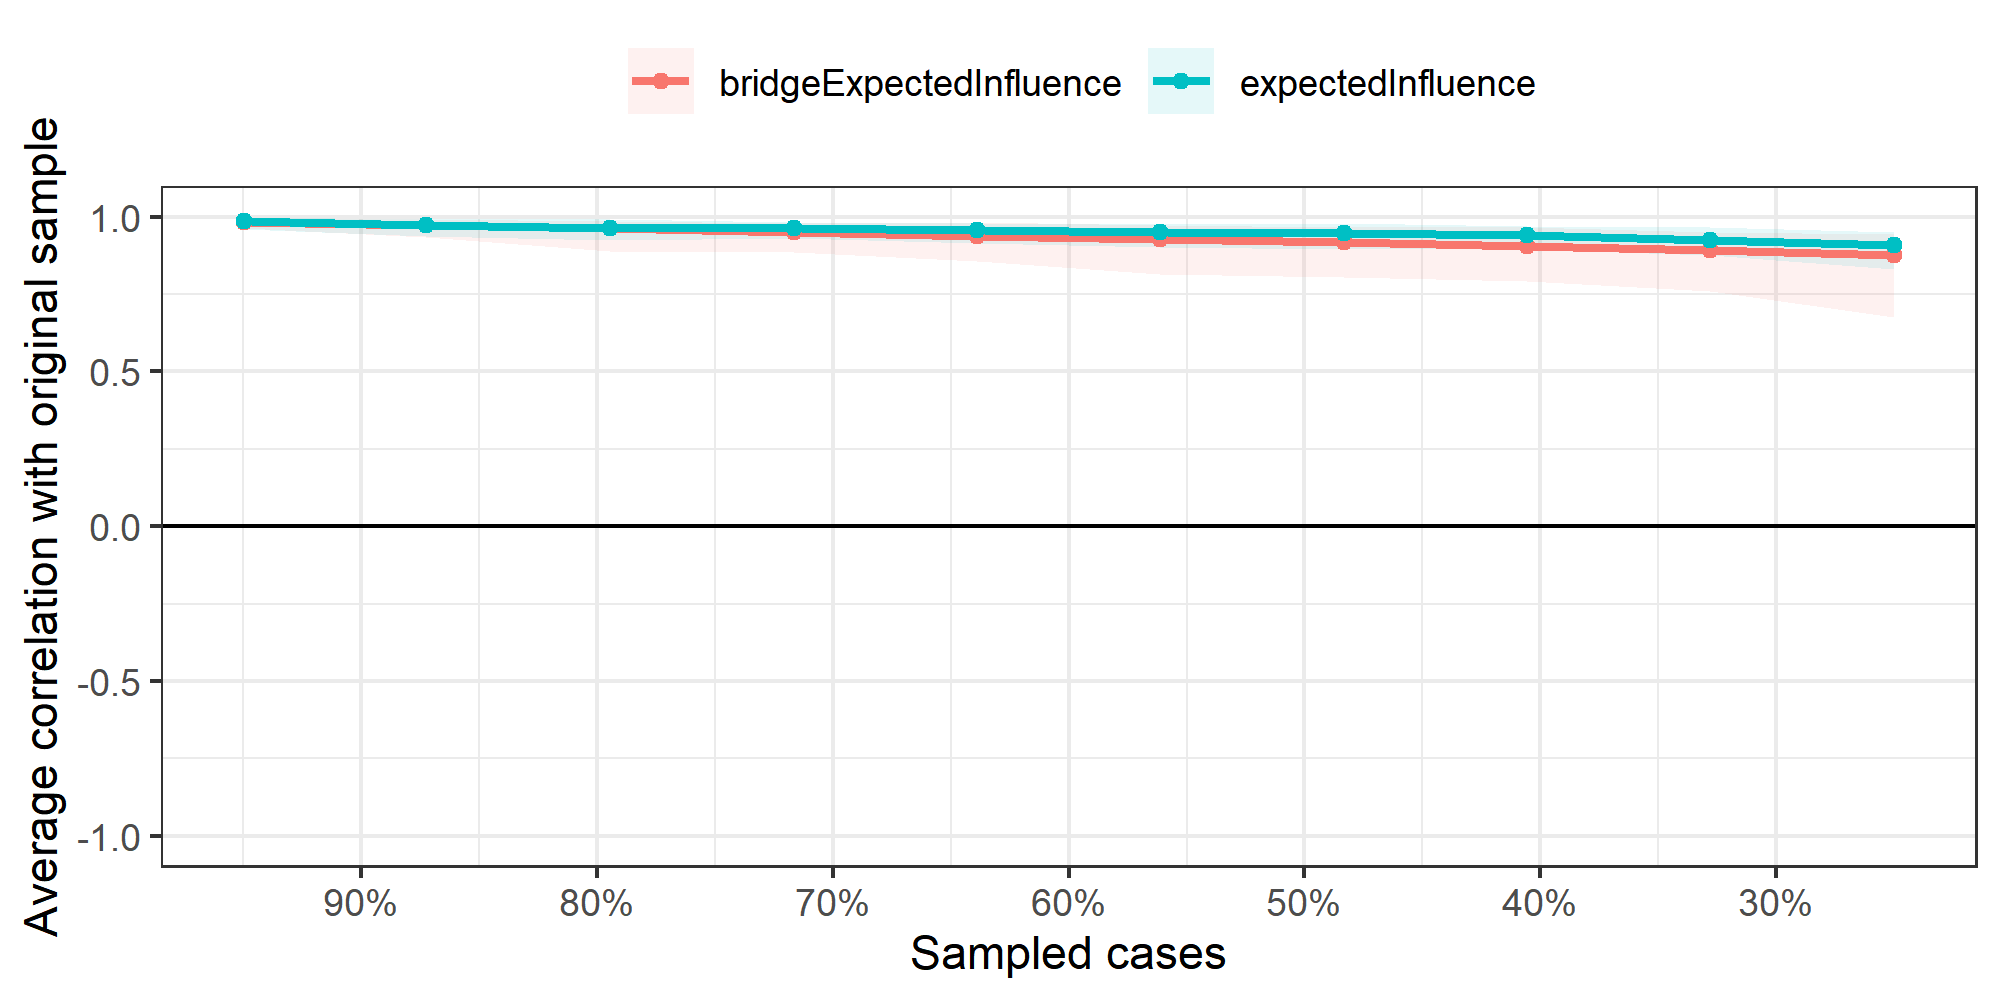


**Figure S2** Robustness Test Results for the Expected Impact Index in Network Analysis
